# Supplementary material
Source: publisher site journal article supplement (https://www.dovepress.com/article/322036)
Supplement: Supplementary file 1 [file get_supplementary_file.php]

COPD exacerbation history and impact on future exacerbations—8‑year retrospective observational database cohort study from Germany

Table of contents

Figures

[Figure S1 Baseline exacerbation composition of each baseline inhaled treatment group. (A) no exacerbations at baseline, (B) one moderate exacerbation, (C) one severe or multiple (regardless of severity) exacerbation at baseline 2](#_Toc72061098)

[Figure S2 Inhaled treatments at baseline by exacerbation history; % of patients in each baseline treatment category on various inhaled treatments: (A) no exacerbations at baseline, (B) one moderate exacerbation, (C) one severe or multiple (regardless of severity) exacerbation at baseline. LABA (long-acting β2-agonist), LAMA (long-acting muscarinic antagonist), ICS (inhaled corticosteroid) 3](#_Toc72061099)

[Figure S3 Comorbidities at baseline, by baseline treatment group 4](#_Toc72061100)

Tables

[Table S1 Criteria used to define moderate and severe exacerbations in the database 2](#_Toc76643392)

[Table S2 Baseline and follow-up characteristics by treatment groups 5](#_Toc76643393)

[Table S3 Comorbidities at baseline, by baseline treatment group and overall 6](#_Toc76643394)

[Table S4 Cumulative incidence with 95% Confidence intervals of a subsequent exacerbation, adjusted for competing risk of death, by time since index date. (A) no exacerbations at baseline, (B) one moderate exacerbation, (C) one severe or multiple (regardless of severity) exacerbation at baseline 7](#_Toc76643395)

[Table S5 Mean cumulative count (MCC) with 95% CIs of a subsequent exacerbation in the overall disease population, by time since index date, adjusted for competing risk of death. (A) no exacerbations at baseline, (B) one moderate exacerbation, (C) one severe or multiple (regardless of severity) exacerbation at baseline 9](#_Toc76643396)

[Table S6 Median time (days) and quintiles from baseline exacerbations until subsequent exacerbation by severity and frequency of baseline exacerbations (cumulative risk adjusted for competing risk of dying according to Fine & Gray). (A) no exacerbations at baseline, (B) one moderate exacerbation, (C) one severe or multiple (regardless of severity) exacerbation at baseline 11](#_Toc76643397)

[Table S7 Risk of a future exacerbation during follow-up by baseline exacerbation category. (A) no exacerbations during baseline, (B) one moderate exacerbation, and (C) one severe or multiple (regardless of severity) exacerbation at baseline 12](#_Toc76643398)

| **Exacerbations** | **Criteria** |
| --- | --- |
| Moderate | ATC code for either an oral corticosteroid (OCS) code (H02AB) or respiratory antibiotics (codes J01AA or J01CA) |
| Severe | ICD-10 code (J44) for a COPD-related hospitalization or emergency visit |

Table S1 Criteria used to define moderate and severe exacerbations in the database

Figure S1 Baseline exacerbation composition of each baseline inhaled treatment group. (A) no exacerbations at baseline, (B) one moderate exacerbation, (C) one severe or multiple (regardless of severity) exacerbation at baseline

Figure S2 Inhaled treatments at baseline by exacerbation history; % of patients in each baseline treatment category on various inhaled treatments: (A) no exacerbations at baseline, (B) one moderate exacerbation, (C) one severe or multiple (regardless of severity) exacerbation at baseline. LABA (long-acting β2-agonist), LAMA (long-acting muscarinic antagonist), ICS (inhaled corticosteroid)

Figure S3 Comorbidities at baseline, by baseline treatment group

| Treatment | Person count | Follow-up total | Follow-up mean | Follow-up median | Age min | Age max | Age mean | Male % |
| --- | --- | --- | --- | --- | --- | --- | --- | --- |
| LABA+LAMA+ICS | 15,051 | 78,673.3 | 5.22 | 6 | 40 | 100 | 67.5 | 62.4% |
| LABA+LAMA | 4,356 | 20,561.8 | 4.72 | 5 | 40 | 97 | 68.2 | 69.4% |
| LABA+ICS or LAMA+ICS | 41,225 | 226,927.2 | 5.50 | 6 | 40 | 101 | 63.4 | 50.5% |
| LABA monotherapy or LAMA monotherapy | 14,674 | 78,333.6 | 5.34 | 6 | 40 | 100 | 67.2 | 62.8% |
| ICS | 11,484 | 62,082.2 | 5.41 | 6 | 40 | 101 | 62.5 | 44.8% |
| no treatment with LAMA, LABA or ICS | 163,933 | 797,686.9 | 4.87 | 5 | 40 | 107 | 62.0 | 59.0% |

Table S2 Baseline and follow-up characteristics by treatment groups

| Comorbidity | LABA/LAMA/ICS | LABA/LAMA | LABA/ICS or LAMA/ICS | LABA monotherapy or LAMA monotherapy | ICS | No treatment with LAMA, LABA or ICS | Overall |
| --- | --- | --- | --- | --- | --- | --- | --- |
| Asthma | 45.74% | 21.69% | 54.71% | 20.03% | 43.16% | 8.74% | 20.98% |
| Pneumonia | 11.10% | 9.64% | 4.83% | 6.20% | 4.43% | 3.15% | 4.25% |
| Osteoporosis | 16.52% | 12.28% | 10.93% | 10.60% | 9.87% | 7.00% | 8.65% |
| Diabetes | 13.95% | 15.01% | 11.96% | 15.18% | 10.94% | 11.32% | 11.86% |
| Ischaemic heart disease | 32.26% | 33.79% | 21.25% | 31.10% | 19.81% | 19.77% | 21.67% |
| PAD | 8.52% | 11.39% | 5.05% | 8.91% | 4.48% | 5.75% | 6.03% |
| Stroke | 4.13% | 4.78% | 3.02% | 4.83% | 2.59% | 3.30% | 3.39% |
| Atrial fibrillation | 14.92% | 15.47% | 8.31% | 14.14% | 7.24% | 7.68% | 8.71% |
| Dementia | 3.75% | 4.80% | 2.39% | 4.78% | 2.16% | 3.36% | 3.28% |
| Heart failure | 25.88% | 27.53% | 12.78% | 20.85% | 10.17% | 10.98% | 13.00% |
| Malignant neoplasm | 17.01% | 19.01% | 12.21% | 16.13% | 11.56% | 10.91% | 11.96% |
| Depression and Anxiety | 23.30% | 18.80% | 23.38% | 21.68% | 25.15% | 20.20% | 21.20% |

Table S3 Comorbidities at baseline, by baseline treatment group and overall

| **Category** | **Time (years)** | **P** | **95% CI lower** | **95% CI upper** |
| --- | --- | --- | --- | --- |
| Overall | 1 | 26.4% | 26.2% | 26.6% |
| Overall | 2 | 36.5% | 36.3% | 36.7% |
| Overall | 3 | 43.3% | 43.1% | 43.5% |
| Overall | 4 | 47.8% | 47.6% | 48.0% |
| Overall | 5 | 51.0% | 50.8% | 51.2% |
| Overall | 6 | 53.1% | 53.0% | 53.3% |
| Overall | 7 | 54.6% | 54.4% | 54.8% |
| Overall | 8 | 55.4% | 55.2% | 55.6% |
| Category A | 1 | 19.0% | 18.9% | 19.2% |
| Category A | 2 | 28.9% | 28.7% | 29.1% |
| Category A | 3 | 35.9% | 35.7% | 36.1% |
| Category A | 4 | 40.7% | 40.5% | 40.9% |
| Category A | 5 | 44.2% | 43.9% | 44.4% |
| Category A | 6 | 46.5% | 46.3% | 46.8% |
| Category A | 7 | 48.2% | 48.0% | 48.4% |
| Category A | 8 | 49.1% | 48.9% | 49.3% |
| Category B | 1 | 38.0% | 37.4% | 38.5% |
| Category B | 2 | 51.5% | 50.9% | 52.1% |
| Category B | 3 | 59.1% | 58.5% | 59.7% |
| Category B | 4 | 63.7% | 63.2% | 64.3% |
| Category B | 5 | 66.8% | 66.2% | 67.3% |
| Category B | 6 | 68.7% | 68.2% | 69.2% |
| Category B | 7 | 69.8% | 69.3% | 70.4% |
| Category B | 8 | 70.5% | 69.9% | 71.0% |
| Category C | 1 | 69.2% | 68.6% | 69.7% |
| Category C | 2 | 77.6% | 77.1% | 78.1% |
| Category C | 3 | 81.7% | 81.2% | 82.2% |
| Category C | 4 | 84.0% | 83.6% | 84.5% |
| Category C | 5 | 85.4% | 85.0% | 85.8% |
| Category C | 6 | 86.2% | 85.7% | 86.6% |
| Category C | 7 | 86.7% | 86.3% | 87.1% |
| Category C | 8 | 87.0% | 86.6% | 87.4% |

Table S4 Cumulative incidence with 95% Confidence intervals of a subsequent exacerbation, adjusted for competing risk of death, by time since index date. (A) no exacerbations at baseline, (B) one moderate exacerbation, (C) one severe or multiple (regardless of severity) exacerbation at baseline

| **Category** | **Time (years)** | **MCF** | **lower** | **upper** |
| --- | --- | --- | --- | --- |
| Overall | 1 | 0.58 | 0.58 | 0.59 |
| Overall | 2 | 1.08 | 1.07 | 1.09 |
| Overall | 3 | 1.56 | 1.54 | 1.57 |
| Overall | 4 | 2.03 | 2.01 | 2.05 |
| Overall | 5 | 2.51 | 2.49 | 2.53 |
| Overall | 6 | 3.00 | 2.97 | 3.02 |
| Overall | 7 | 3.47 | 3.44 | 3.50 |
| Overall | 8 | 3.89 | 3.85 | 3.92 |
| Category A | 1 | 0.32 | 0.31 | 0.32 |
| Category A | 2 | 0.60 | 0.60 | 0.61 |
| Category A | 3 | 0.89 | 0.88 | 0.90 |
| Category A | 4 | 1.20 | 1.18 | 1.21 |
| Category A | 5 | 1.52 | 1.50 | 1.53 |
| Category A | 6 | 1.85 | 1.83 | 1.87 |
| Category A | 7 | 2.18 | 2.16 | 2.20 |
| Category A | 8 | 2.46 | 2.44 | 2.49 |
| Category B | 1 | 0.71 | 0.70 | 0.73 |
| Category B | 2 | 1.32 | 1.29 | 1.34 |
| Category B | 3 | 1.89 | 1.85 | 1.92 |
| Category B | 4 | 2.47 | 2.42 | 2.52 |
| Category B | 5 | 3.04 | 2.98 | 3.10 |
| Category B | 6 | 3.62 | 3.55 | 3.69 |
| Category B | 7 | 4.19 | 4.11 | 4.27 |
| Category B | 8 | 4.70 | 4.61 | 4.80 |
| Category C | 1 | 2.46 | 2.42 | 2.49 |
| Category C | 2 | 4.43 | 4.38 | 4.49 |
| Category C | 3 | 6.26 | 6.17 | 6.34 |
| Category C | 4 | 7.99 | 7.88 | 8.10 |
| Category C | 5 | 9.66 | 9.53 | 9.80 |
| Category C | 6 | 11.24 | 11.08 | 11.40 |
| Category C | 7 | 12.73 | 12.55 | 12.91 |
| Category C | 8 | 14.05 | 13.84 | 14.26 |

Table S5 Mean cumulative count (MCC) with 95% CIs of a subsequent exacerbation in the overall disease population, by time since index date, adjusted for competing risk of death. (A) no exacerbations at baseline, (B) one moderate exacerbation, (C) one severe or multiple (regardless of severity) exacerbation at baseline

| **Category** | **Quintile** | **Time (days)** | **Lower CI** | **Upper CI** |
| --- | --- | --- | --- | --- |
| Overall | 0.25 | 329 | 325 | 333 |
| Overall | 0.5 | 1489 | 1477 | 1501 |
| Overall | 0.75 |  |  |  |
| A | 0.25 | 569 | 561 | 577 |
| A | 0.5 | 2046 | 2019 | 2073 |
| A | 0.75 |  |  |  |
| B | 0.25 | 166 | 160 | 173 |
| B | 0.5 | 680 | 662 | 700 |
| B | 0.75 | 2474 | 2371 | 2579 |
| C | 0.25 | 36 | 35 | 37 |
| C | 0.5 | 108 | 105 | 111 |
| C | 0.75 | 579 | 553 | 611 |

Table S6 Median time (days) and quintiles from baseline exacerbations until subsequent exacerbation by severity and frequency of baseline exacerbations (cumulative risk adjusted for competing risk of dying according to Fine & Gray). (A) no exacerbations at baseline, (B) one moderate exacerbation, (C) one severe or multiple (regardless of severity) exacerbation at baseline

| **Exacerbation** | **Category** | **Hazard rate** | **Lower** | **Upper** |
| --- | --- | --- | --- | --- |
| moderate exacerbation | Category A | 1.000 | 1.000 | 1.000 |
| moderate exacerbation | Category B | 1.887 | 1.871 | 1.902 |
| moderate exacerbation | Category C | 3.926 | 3.911 | 3.942 |
| severe exacerbation | Category A | 1.000 | 1.000 | 1.000 |
| severe exacerbation | Category B | 1.304 | 1.269 | 1.339 |
| severe exacerbation | Category C | 2.962 | 2.935 | 2.990 |

Table S7 Risk of a future exacerbation during follow-up by baseline exacerbation category. (A) no exacerbations during baseline, (B) one moderate exacerbation, and (C) one severe or multiple (regardless of severity) exacerbation at baseline
